# Supplementary material for: Antiferromagnetic spin ordering in two-dimensional honeycomb lattice of SiP3
Source: Royal Society of Chemistry journal article supplement (doi:10.1039/d1na00101a), 2021-01-01
Supplement: d1na00101a1.pdf [file d1na00101a1.pdf]

# Electronic Supplementary Information

## Antiferromagnetic spin ordering in two-dimensional honeycomb lattice of SiP<sub>3</sub>

Souren Adhikary<sup>a</sup>, Sudipta Dutta<sup>a,b\*</sup> and Sasmita Mohakud<sup>a,b\*</sup>

<sup>a</sup>*Department of Physics and* <sup>b</sup>*Center for Atomic, Molecular and Optical Sciences and Technologies,*  
*Indian Institute of Science Education and Research (IISER) Tirupati, Tirupati-517507, Andhra*  
*Pradesh, India*

E-mail: [sdutta@iisertirupati.ac.in](mailto:sdutta@iisertirupati.ac.in), [smohakud@gmail.com](mailto:smohakud@gmail.com)

### **Details of VASP (Vienna Ab-initio Simulations Package) Calculations:**

We use projector-augmented wave as implemented within VASP<sup>1-4</sup>. The exchange and correlation functional has been approximated with Perdew-Burke-Ernzerhof (PBE) scheme within generalized gradient approximation (GGA). An energy cutoff of 400 eV is considered with 12×12×1 Monkhorst-Pack k-point grid. The structural optimization is performed with a force tolerance of 0.01 eV/Å on each atom and the electronic energy convergence threshold is considered as 10<sup>-8</sup> eV. A vacuum of 15Å is created in the non-periodic direction to avoid the interactions between adjacent unit cells.

**Table S1:** The structural parameters of  $XP_3$  systems: lattice constants of hexagonal unit cell ( $b_1$ ), the bond-lengths of  $P-P$  ( $a$ ) and  $P-X$  ( $b$ ),  $\angle P-P-P$  ( $\theta_1$ ) and  $\angle P-P-X$  ( $\theta_2$ ) and out-of plane buckling parameters  $\Delta_z (P-P)$  and  $\Delta_z (P-X)$ . The schematic representations of these parameters are shown in Fig.1(c) in the main manuscript. Note that, the lengths and the angles are in  $\text{\AA}$  and degree, respectively. *All these structural parameters are obtained from SIESTA calculations using the localized orbital basis.*

| System                         | $b_1$        | $a$         | $b$         | $\Delta_z (P-P)$ | $\Delta_z (P-X)$ | $\theta_1$   | $\theta_2$   |
|--------------------------------|--------------|-------------|-------------|------------------|------------------|--------------|--------------|
| <b>Pristine Blue P (2 X 2)</b> | <b>6.65</b>  | <b>2.31</b> | <b>2.31</b> | <b>1.28</b>      | <b>1.28</b>      | <b>92.22</b> | <b>92.22</b> |
| CP <sub>3</sub>                | 6.299        | 2.33        | 1.81        | 1.41             | 0.34             | 87.41        | 106.09       |
| <b>SiP<sub>3</sub></b>         | <b>6.926</b> | <b>2.30</b> | <b>2.30</b> | <b>1.287</b>     | <b>0.983</b>     | <b>91.78</b> | <b>97.92</b> |
| GeP <sub>3</sub>               | 6.996        | 2.22        | 2.51        | 0.769            | 1.567            | 108.65       | 98.57        |
| SnP <sub>3</sub>               | 7.157        | 2.22        | 2.71        | 0.723            | 1.798            | 109.9        | 97.97        |

**Table S2:** The structural parameters of  $XP_3$  systems: lattice constants of hexagonal unit cell ( $b_1$ ), the bond-lengths of  $P-P$  ( $a$ ) and  $P-X$  ( $b$ ),  $\angle P-P-P$  ( $\theta_1$ ) and  $\angle P-P-X$  ( $\theta_2$ ) and out-of plane buckling parameters  $\Delta_z (P-P)$  and  $\Delta_z (P-X)$ . The schematic representations of these parameters are shown in Fig.1(c) in the main manuscript. Note that, the lengths and the angles are in  $\text{\AA}$  and degree, respectively. *All these structural parameters are obtained from VASP calculations using the plane wave basis.*

| System                         | $b_1$       | $a$         | $b$         | $\Delta_z (P-P)$ | $\Delta_z (P-X)$ | $\theta_1$   | $\theta_2$   |
|--------------------------------|-------------|-------------|-------------|------------------|------------------|--------------|--------------|
| <b>Pristine Blue P (2 X 2)</b> | <b>6.55</b> | <b>2.26</b> | <b>2.26</b> | <b>1.24</b>      | <b>1.24</b>      | <b>92.9</b>  | <b>92.9</b>  |
| CP <sub>3</sub>                | 6.25        | 2.29        | 1.78        | 1.34             | 0.33             | 89.19        | 106.78       |
| <b>SiP<sub>3</sub></b>         | <b>6.84</b> | <b>2.25</b> | <b>2.28</b> | <b>1.26</b>      | <b>0.94</b>      | <b>91.82</b> | <b>98.50</b> |
| GeP <sub>3</sub>               | 6.96        | 2.17        | 2.50        | 0.71             | 1.55             | 109.70       | 99.60        |
| SnP <sub>3</sub>               | 7.15        | 2.17        | 2.71        | 0.66             | 1.75             | 111.01       | 99.49        |

**Table S3:** Orbital occupancy and hybridization analysis of the marked atoms in pristine blue phosphorene, silicene and SiP<sub>3</sub> systems. The schematic structures along with the spin distribution are given in the first column. The relative sizes of the arrows indicate the magnitude of the spin moments. The numbers of electrons participating in  $sp^2$  hybridization are given in second column. The  $\pi$ -electrons with up and down-spin polarizations for the marked atoms are shown in highlighted columns. *All these numerical values are obtained from SIESTA calculations using the localized orbital basis.* Note that, the hybridization of Si and P atoms in SiP<sub>3</sub> remains unaltered as compared to that in pristine silicene and blue phosphorene. There is a transfer of down spins from marked P atom to marked Si atom in SiP<sub>3</sub>, resulting in higher local up-spin density on P atom.

| System                                                                                                            | $sp^2 (s + p_x + p_y)$       | $\pi (p_z)$            |                            |
|-------------------------------------------------------------------------------------------------------------------|------------------------------|------------------------|----------------------------|
|                                                                                                                   |                              | Up spin ( $\uparrow$ ) | Down spin ( $\downarrow$ ) |
| <p><b>Blue Phosphorene</b></p> 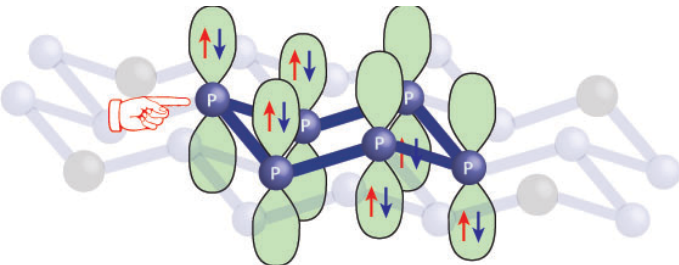 | 3.466                        | 0.614                  | 0.614                      |
| <p><b>Silicene</b></p>         | 2.966                        | 0.387                  | 0.387                      |
| <p><b>SiP<sub>3</sub></b></p>                                                                                     | <p><b>P</b></p> <p>3.475</p> | <b>0.614</b>           | <b>0.573</b>               |

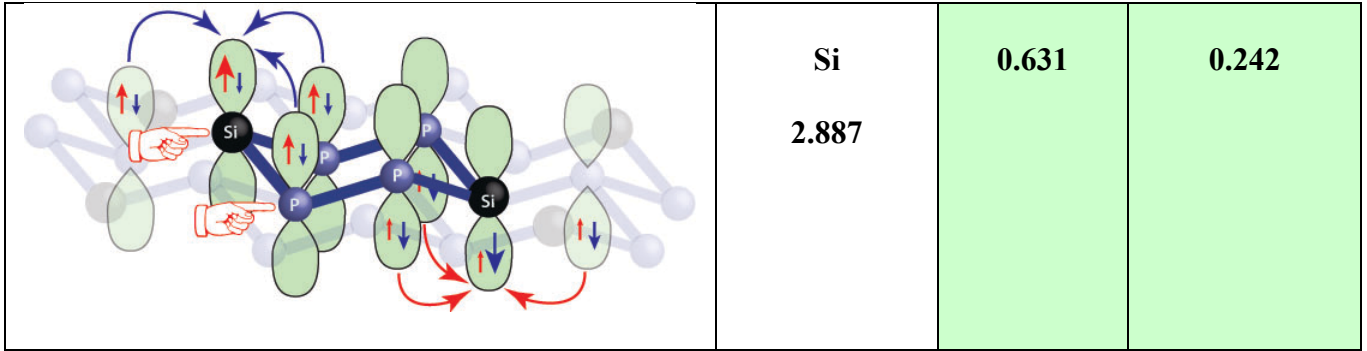

**Table S4:** The total energy per atom (in  $eV$ ) of all  $XP_3$  systems in different ground states. NM, FM and AFM denote the non-magnetic, ferromagnetic and antiferromagnetic ground states, respectively. The FM and AFM energies are same as the NM energies in all the systems except  $SiP_3$  with no local spin-polarization. It can be concluded that, these systems do not gain any stability with explicit consideration of spins and therefore the entries in the tables are kept blank. *Note that, these energies are obtained from SIESTA calculations using the localized orbital basis.*

| System                 | NM     | FM     | AFM           |
|------------------------|--------|--------|---------------|
| <b>Pristine Blue P</b> | -4.038 | ~      | ~             |
| <b>CP<sub>3</sub></b>  | -4.732 | ~      | ~             |
| <b>SiP<sub>3</sub></b> | -4.137 | -4.138 | <b>-4.146</b> |
| <b>GeP<sub>3</sub></b> | -3.992 | ~      | ~             |
| <b>SnP<sub>3</sub></b> | -4.386 | ~      | ~             |

**Table S5:** The total energy per atom (in  $eV$ ) of all  $XP_3$  systems in different ground states. NM, FM and AFM denote the non-magnetic, ferromagnetic and antiferromagnetic ground states, respectively. The FM and AFM energies are same as the NM energies in all the systems except  $SiP_3$  with no local spin-polarization and that is why the entries are left blank. *Note that, these energies are obtained from VASP calculations using the plane wave basis.*

| System          | NM      | FM      | AFM     |
|-----------------|---------|---------|---------|
| Pristine Blue P | -3.476  | ~       | ~       |
| $CP_3$          | -4.151  | ~       | ~       |
| $SiP_3$         | -3.5070 | -3.5087 | -3.5089 |
| $GeP_3$         | -3.341  | ~       | ~       |
| $SnP_3$         | -3.258  | ~       | ~       |

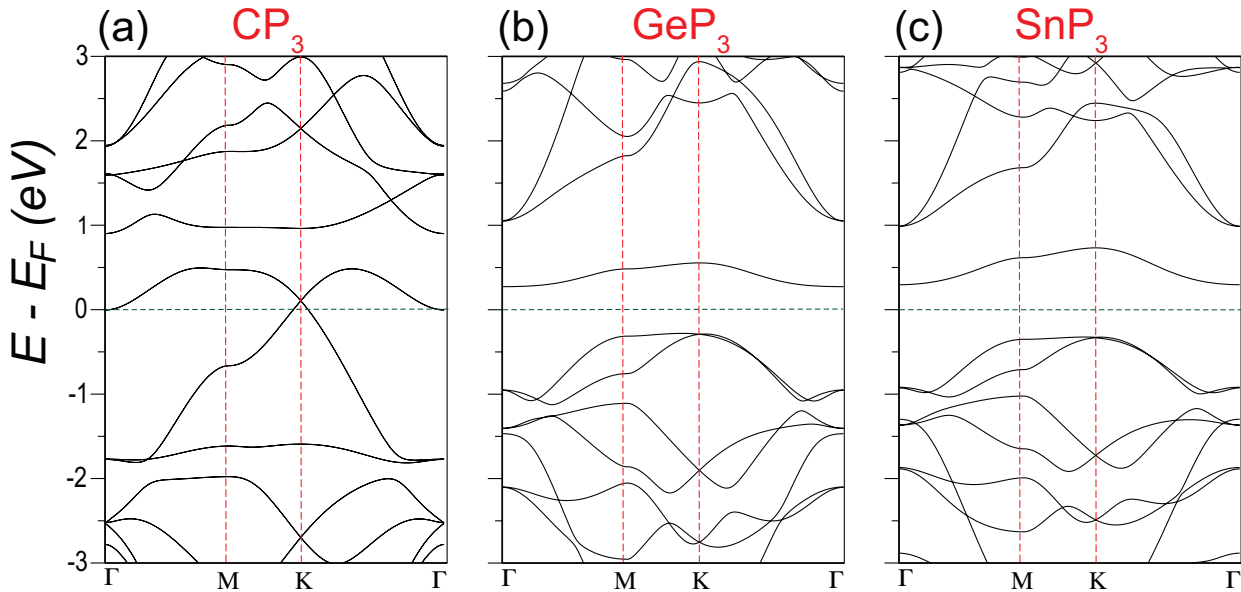

**Figure S1:** The band structures of (a)  $CP_3$ , (b)  $GeP_3$  and (c)  $SnP_3$  systems in nonmagnetic ground state, as obtained from calculations considering localized orbital basis using SIESTA. The vertical (horizontal) lines show the high-symmetric points (Fermi energy). The band structures remain unchanged for initial guesses of FM and AFM spin alignments.

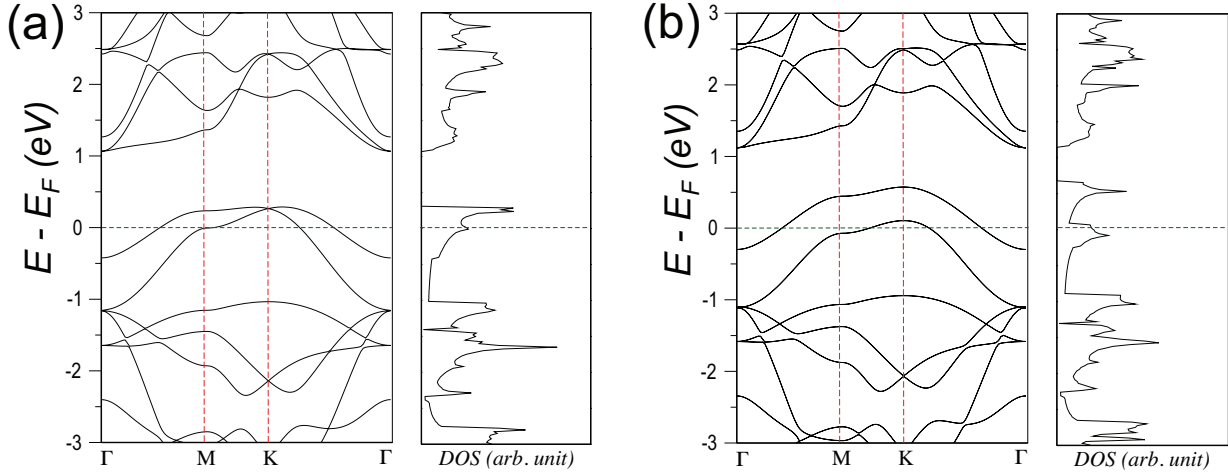

**Figure S2:** The band structures and density of states (DOS) of  $\text{SiP}_3$  system in (a) nonmagnetic (NM) and (b) antiferromagnetic (AFM) ground states, as obtained from calculations considering plane wave basis using VASP. The vertical (horizontal) lines show the high-symmetric points (Fermi energy). The AFM ground state shows dispersive bands at Fermi energy and consequent metallic behavior, unlike the small semiconducting gap obtained from the SIESTA calculations using localized basis (see Fig.3(b) in main manuscript).

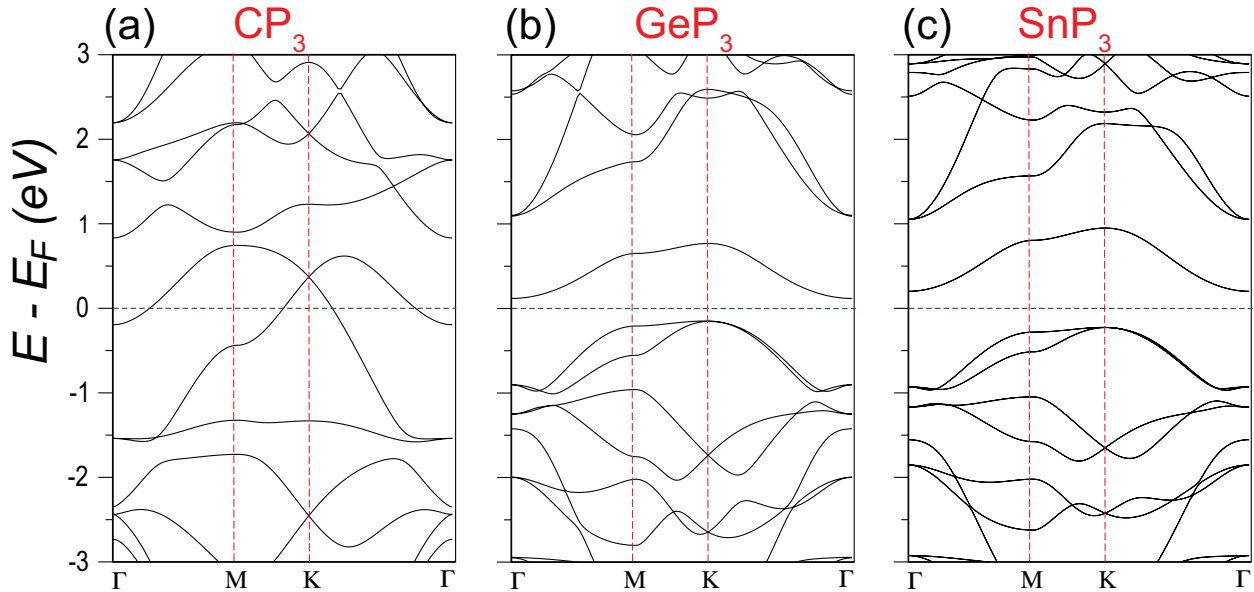

**Figure S3:** The band structures of (a)  $\text{CP}_3$ , (b)  $\text{GeP}_3$  and (c)  $\text{SnP}_3$  systems in nonmagnetic ground state, as obtained from calculations considering plane wave basis using VASP. The vertical (horizontal) lines show the high-symmetric points (Fermi energy). The band structures remain unchanged for initial guesses of FM and AFM spin alignments.

## References:

1. P. E. Blöchl, "Projector augmented wave method. *Phys. Rev. B*, 1994, **50**, 17953.
2. G. Kresse and J. Furthmüller, Efficient iterative schmes for ab initio total-energy calculations using plane-wave basis set. *Phys. Rev. B*, 1996, **54**, 11169
3. G. Kresse and J. Furthmüller, Efficiency of ab-initio total energy calculations for metals and semiconductors using plane-wave basis set. *Comp. Mater. Sci.*, 1996, **6**, 15.
4. G. Kresse and D. Joubert, From ultrasoft pseudopotentials to the projector augmented wave method. *Phys. Rev. B*, 1999, **59**, 1758.
